# Supplementary material
Source: publisher site journal article supplement (https://www.dovepress.com/article/353141)
Supplement: Supplementary file 1 [file get_supplementary_file.php]

| **Supplementary material**  Table S1. Sensitivity analyses for the associations between treatment response and daytime function by different frequencies of hypnotics use* | | | | | |
| --- | --- | --- | --- | --- | --- |
| **Frequency of hypnotics use** | Poor daytime function |  | Daytime function | | |
|  | Poor at staying awaking |  | Poor at maintaining enthusiasm |
| AOR (95% CI) |  | AOR (95% CI) | AOR (95% CI) |
| **≥ 1 time /week** |  |  |  |  |  |
| **Treatment response of hypnotics** |  |  |  |  |  |
| Healthy control vs. treated with good sleep quality | 0.43 (0.26-0.70) |  | 0.59 (0.29-1.20) |  | 0.36 (0.21-0.63) |
| Treated with poor sleep quality vs. treated with good sleep quality | 6.43 (4.03-1.26) |  | 3.50 (1.71-7.15) |  | 7.01 (4.25-11.58) |
| Not treated with poor sleep quality vs. treated with good sleep quality | 4.98 (3.15-7.87) |  | 2.78 (1.37-5.65) |  | 5.75 (3.51-9.41) |
| **≥ 2 times /week** |  |  |  |  |  |
| **Treatment response of hypnotics** |  |  |  |  |  |
| Healthy control vs. treated with good sleep quality | 0.44 (0.27-0.72) |  | 0.55 (0.27-1.12) |  | 0.39 (0.22-0.68) |
| Treated with poor sleep quality vs. treated with good sleep quality | 6.34 (3.91-10.31) |  | 3.05 (1.47-6.35) |  | 7.19 (4.27-12.13) |
| Not treated with poor sleep quality vs. treated with good sleep quality | 5.13 (3.22-8.19) |  | 2.81 (1.39-5.66) |  | 5.92 (3.56-9.84) |
| **≥ 3 times /week** |  |  |  |  |  |
| **Treatment response of hypnotics** |  |  |  |  |  |
| Healthy control vs. treated with good sleep quality | 0.43 (0.26-0.72) |  | 0.51 (0.25-1.05) |  | 0.39 (0.22-0.68) |
| Treated with poor sleep quality vs. treated with good sleep quality | 6.41 (3.90-10.55) |  | 3.04 (1.45-6.37) |  | 7.42 (4.33-12.70) |
| Not treated with poor sleep quality vs. treated with good sleep quality | 4.98 (3.11-7.99) |  | 2.60 (1.29-5.24) |  | 5.75 (3.43-9.63) |
| **≥ 4 times /week** |  |  |  |  |  |
| **Treatment response of hypnotics** |  |  |  |  |  |
| Healthy control vs. treated with good sleep quality | 0.42 (0.25-0.69) |  | 0.49 (0.24-1.02) |  | 0.37 (0.21-0.66) |
| Treated with poor sleep quality vs. treated with good sleep quality | 6.45 (3.91-10.63) |  | 3.02 (1.44-6.33) |  | 7.48 (4.36-12.82) |
| Not treated with poor sleep quality vs. treated with good sleep quality | 4.78 (2.98-7.667) |  | 2.50 (1.24-5.04) |  | 5.52 (3.30-9.25) |
| **≥ 5 times /week** |  |  |  |  |  |
| **Treatment response of hypnotics** |  |  |  |  |  |
| Healthy control vs. treated with good sleep quality | 0.42 (0.25-0.69) |  | 0.49 (0.24-1.01) |  | 0.37 (0.21-0.66) |
| Treated with poor sleep quality vs. treated with good sleep quality | 6.53 (3.95-10.77) |  | 3.03 (1.44-6.35) |  | 7.56 (4.41-12.97) |
| Not treated with poor sleep quality vs. treated with good sleep quality | 4.71 (2.94-7.56) |  | 2.47 (1.22-4.99) |  | 5.45 (3.25-9.13) |
| **≥ 6 times /week** |  |  |  |  |  |
| **Treatment response of hypnotics** |  |  |  |  |  |
| Healthy control vs. treated with good sleep quality | 0.41 (0.25-0.68) |  | 0.49 (0.24-1.00) |  | 0.36 (0.21-0.64) |
| Treated with poor sleep quality vs. treated with good sleep quality | 6.42 (3.88-10.62) |  | 2.94 (1.39-6.19) |  | 7.36 (4.30-12.71) |
| Not treated with poor sleep quality vs. treated with good sleep quality | 4.65 (2.90-7.46) |  | 2.49 (1.23-5.01) |  | 5.39 (3.21-9.02) |
| Abbreviations: AOR, adjusted odds ratio | | | | | |
| *Variables specified in the multiple logistic regression analyses included age, sex, education status, living status, cigarette smoking, alcohol drinking, diabetes mellitus, hypertension, cardiac disease, hyperlipidemia, stroke, snore, fall, depression and anxiety subscale of the Hospital Anxiety and Depression Scale, and Epworth Sleepiness scale | | | | | |
